# Supplementary material
Source: publisher figshare collection journal article supplement (https://acs.figshare.com/ndownloader/files/4687411)
Supplement: Supplementary file 1 [file 4687411]

**Supporting Information**

3,17-Disubstituted 2-Alkylestra-1,3,5(10)-trien-3-ol Derivatives: Synthesis, *In Vitro* and *In Vivo* Anti-Cancer Activity

Christian Bubert,† Mathew P. Leese,† Mary F. Mahon,‡ Eric Ferrandis,§ Sandra Regis-Lydi,§ Philip G. Kasprzyk,± Simon P. Newman,# Yaik. T. Ho,# Atul Purohit,# Michael J. Reed,# and Barry V. L. Potter*,†

Medicinal Chemistry, Department of Pharmacy and Pharmacology & Sterix Ltd., University of Bath, Bath BA2 7AY, UK; Endocrinology and Metabolic Medicine and Sterix Ltd., Faculty of Medicine, Imperial College, St. Mary’s Hospital, London W2 1NY, UK; Department of Chemistry, University of Bath, BA2 7AY, UK; IPSEN System Biology, 91966 Les Ulis, France; Experimental Oncology Research IPSEN / Biomeasure, Inc. 27 Maple Street, Milford, MA 01757 USA.

**Contents:**  Microanalysis data for **2**, **7**-**9**, **12**-**18**, **24**, **27**-**34**, **38**, **41**-**48**, **50**-**56** (pages 2-3), crystallographic data for compound **50** (pages 4 to 10), 13C NMR data for compounds (pages 11 to 15) and IR data for **37-42**, **49** & **50** (page 16).

**Microanalysis data**

|  |  | Found | | | Calculated | | |
| --- | --- | --- | --- | --- | --- | --- | --- |
| Compd. no. | Formula | C | H | N | C | H | N |
| **2** | C20H28O2 | 80.0 | 9.37 | - | 79.96 | 9.39 | - |
| **7** | C21H29O2 | 77.0 | 9.00 | 4.39 | 77.02 | 8.93 | 4.28 |
| **8** | C19H26O2*C2H5OH | 75.9 | 9.71 | - | 75.86 | 9.70 | - |
| **9** | C22H29O2 | 80.9 | 9.19 | - | 80.94 | 9.26 | - |
| **12** | C23H30NO4 | 74.6 | 8.14 | - | 74.56 | 8.16 | - |
| **13** | C24H32O4 | 74.8 | 8.38 | - | 74.97 | 8.39 | - |
| **14** | C25H34O4 | 75.3 | 8.78 | - | 75.34 | 8.60 | - |
| **15** | C22H28O4 | 73.9 | 7.85 | - | 74.13 | 7.92 | - |
| **16** | C23H30O4 | 74.4 | 8.11 | - | 74.56 | 8.16 | - |
| **17** | C24H32O4 | 75.3 | 8.37 | - | 74.97 | 8.39 | - |
| **18** | C22H30O3 | 77.0 | 8.83 | - | 77.16 | 8.83 | - |
| **24** | C22H32O2 | 80.1 | 9.83 | - | 80.44 | 9.82 | - |
| **27** | C19H28N2O6S2 | 51.5 | 6.40 | 6.11 | 51.33 | 6.35 | 6.30 |
| **28** | C21H32N2O6S2 | 53.2 | 6.91 | 5.88 | 53.37 | 6.82 | 5.93 |
| **29** | C21H32N2O6S2 | 53.5 | 6.78 | 5.74 | 53.37 | 6.82 | 5.93 |
| **30** | C22H34N2O6S2 | 53.9 | 6.97 | 5.75 | 54.30 | 7.04 | 5.76 |
| **31** | C22H34N2O6S | 54.5 | 7.15 | 5.65 | 54.30 | 7.04 | 5.76 |
| **32** | C22H31NO5S | 62.7 | 7.37 | 3.24 | 62.68 | 7.41 | 3.32 |
| **33** | C23H33NO5S | 63.6 | 7.60 | 3.20 | 63.42 | 7.64 | 3.22 |
| **34** | C24H35NO5S | 64.1 | 7.79 | 3.01 | 64.11 | 7.85 | 3.12 |
| **38** | C29H32Cl3NO3 | 59.7 | 5.54 | 2.40 | 59.96 | 5.55 | 2.41 |
| **41** | C19H25NO3 | 72.2 | 7.89 | 4.47 | 72.35 | 7.99 | 4.44 |
| **42** | C20H27NO4 | 69.4 | 7.81 | 3.95 | 69.54 | 7.88 | 4.05 |
| **43** | C20H27NO3 | 72.5 | 4.06 | 8.28 | 72.92 | 8.26 | 4.25 |
| **44** | C23H33NO | 73.4 | 8.39 | 4.00 | 73.44 | 8.51 | 4.08 |
| **45** | C22H31NO3 | 74.0 | 8.81 | 3.90 | 73.91 | 8.74 | 3.92 |
| **46** | C22H31NO3 | 74.0 | 8.71 | 3.79 | 73.91 | 8.74 | 3.92 |
| **47** | C23H33NO3 | 74.0 | 8.98 | 3.96 | 74.36 | 8.95 | 3.77 |
| **48** | C23H33NO3 | 74.2 | 9.00 | 3.66 | 74.36 | 8.95 | 3.77 |
| **50** | C20H28N2O6S | 56.3 | 6.64 | 6.34 | 56.59 | 6.65 | 6.60 |
| **51** | C20H38N2O5S | 58.5 | 6.93 | 6.85 | 58.8 | 6.93 | 6.85 |
| **52** | C21H30N2O5S | 59.7 | 7.16 | 6.64 | 59.69 | 7.16 | 6.63 |
| **53** | C22H32N5O5S | 60.6 | 7.33 | 6.14 | 60.53 | 7.39 | 6.42 |
| **54** | C22H32N2O5S | 60.7 | 7.35 | 6.38 | 60.53 | 7.39 | 6.42 |
| **55** | C23H34N5O5S | 61.3 | 7.62 | 6.03 | 61.31 | 7.61 | 6.22 |
| **56** | C23H34N2O5S | 61.1 | 7.75 | 6.05 | 61.31 | 7.61 | 6.22 |

**X-Ray crystallographic data of 50**

**Figure 1**. X-ray crystal structure of **50**.

**
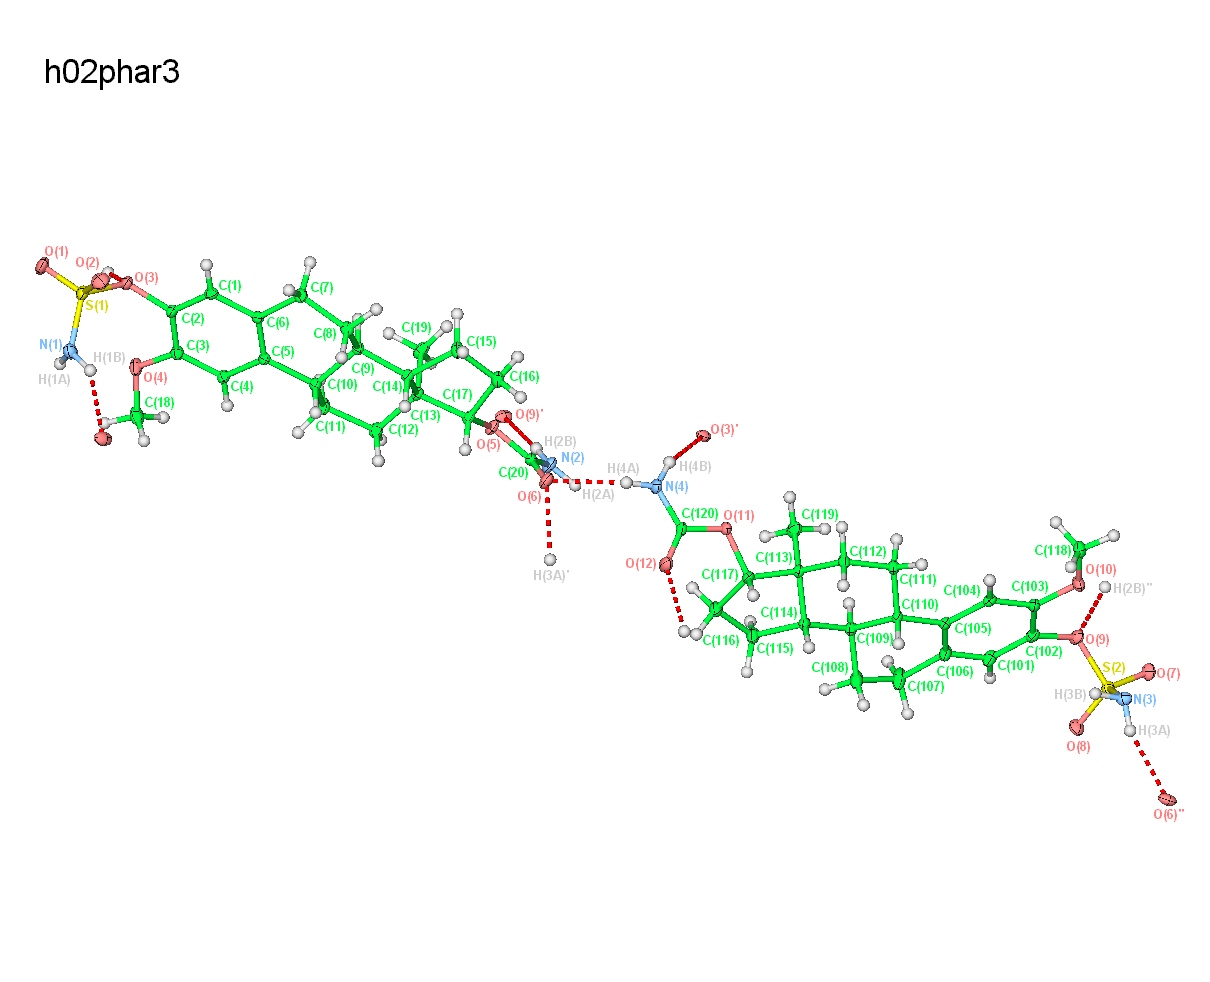
**

**Table 1.** Crystal data and structure refinement for **50**.

| Identification code | h02phar3 |
| --- | --- |
| Empirical formula | C20 H28 N2 O6 S |
| Formula weight | 424.50 |
| Temperature | 150(2) K |
| Wavelength | 0.71073 Å |
| Crystal system | Monoclinic |
| Space group | P21 |
| Unit cell dimensions | a = 9.0350(1)Å  = 90o |
|  | b = 25.5210(4)Å  = 100.288(1)o |
|  | c = 9.1370(1)Å  = 90o |
| Volume | 2072.96(5) Å3 |
| Z | 4 |
| Density (calculated) | 1.360 Mg/m3 |
| Absorption coefficient | 0.196 mm-1 |
| F(000) | 904 |
| Crystal size | 0.35 x 0.25 x 0.10 mm |
| Theta range for data collection | 3.78 to 27.49o |
| Index ranges | -11<=h<=11; -33<=k<=33; -11<=l<=11 |
| Reflections collected | 29753 |
| Independent reflections | 9299 [R(int) = 0.0528] |
| Reflections observed (>2) | 6850 |
| Data Completeness | 0.996 |
| Max. and min. transmission | 0.9807 and 0.9347 |
| Refinement method | Full-matrix least-squares on F2 |
| Data / restraints / parameters | 9299 / 9 / 544 |
| Goodness-of-fit on F2 | 0.982 |
| Final R indices [I>2(I)] | R1 = 0.0416 wR2 = 0.0780 |
| R indices (all data) | R1 = 0.0737 wR2 = 0.0871 |
| Absolute structure parameter | 0.06(4) |
| Largest diff. peak and hole | 0.385 and -0.376 eÅ-3 |

**Notes**: 2 molecules in the asymmetric unit. Hydrogens on N1 and N3 located and refined at 0.89 Å from parent atoms. Extensive hydrogenbonding in solid state.

**Hydrogen bonds with H..A < r(A) + 2.000 Angstroms and <DHA > 110 deg.**

**D-H d(D-H) d(H..A) <DHA d(D..A) A**

N2-H2A 0.880 2.587 139.11 3.303 O1 [ -x, y-1/2, -z+1 ]

N2-H2B 0.880 2.186 172.66 3.060 O9 [ -x-2, y+1/2, -z+1 ]

N2-H2B 0.880 2.623 129.91 3.258 O7 [ -x-2, y+1/2, -z+1 ]

N4-H4A 0.880 2.134 155.47 2.957 O6

N4-H4B 0.880 2.328 148.91 3.115 O3 [ -x, y-1/2, -z+1 ]

N1-H1B 0.899 1.986 145.77 2.776 O12[ -x, y+1/2, -z+2 ]

N1-H1A 0.950 2.509 134.72 3.248 O7 [ x+2, y+1, z ]

N3-H3A 0.861 2.118 160.07 2.942 O6 [ -x-2, y-1/2, -z+2 ]

N3-H3B 0.878

**Table 2.** Atomic coordinates ( x 104) and equivalent isotropic displacement parameters (Å2 x 103) for **50**. U(eq) is defined as one third of the trace of the orthogonalized Uij tensor.

| Atom | x | y | z | U(eq) |
| --- | --- | --- | --- | --- |
|  |  |  |  |  |
| S(1) | 6853(1) | 7859(1) | 5990(1) | 34(1) |
| S(2) | -16164(1) | -662(1) | 8158(1) | 28(1) |
| O(1) | 7237(2) | 8210(1) | 4917(2) | 50(1) |
| O(2) | 7969(2) | 7566(1) | 6918(2) | 45(1) |
| O(3) | 5761(2) | 7456(1) | 4963(2) | 32(1) |
| O(4) | 2958(2) | 7702(1) | 5267(2) | 40(1) |
| O(5) | -2149(2) | 4413(1) | 6152(2) | 33(1) |
| O(6) | -2790(2) | 3973(1) | 8087(2) | 38(1) |
| O(7) | -16917(2) | -1065(1) | 7228(2) | 37(1) |
| O(8) | -16968(2) | -209(1) | 8450(2) | 40(1) |
| O(9) | -14864(2) | -507(1) | 7264(2) | 35(1) |
| O(10) | -12041(2) | -811(1) | 8214(2) | 42(1) |
| O(11) | -5931(2) | 2383(1) | 8596(2) | 30(1) |
| O(12) | -5001(2) | 3008(1) | 10254(2) | 43(1) |
| N(1) | 5866(3) | 8151(1) | 7006(2) | 39(1) |
| N(2) | -4375(2) | 4030(1) | 5870(2) | 36(1) |
| N(3) | -15248(3) | -877(1) | 9700(2) | 34(1) |
| N(4) | -4187(2) | 2925(1) | 8066(2) | 34(1) |
| C(1) | 5519(3) | 6599(1) | 6039(2) | 29(1) |
| C(2) | 4918(3) | 7089(1) | 5628(2) | 27(1) |
| C(3) | 3447(3) | 7207(1) | 5708(2) | 31(1) |
| C(4) | 2565(3) | 6823(1) | 6190(2) | 30(1) |
| C(5) | 3126(3) | 6319(1) | 6571(2) | 26(1) |
| C(6) | 4627(3) | 6209(1) | 6521(2) | 27(1) |
| C(7) | 5315(3) | 5673(1) | 6907(3) | 30(1) |
| C(8) | 4319(2) | 5309(1) | 7627(2) | 31(1) |
| C(9) | 2701(2) | 5347(1) | 6781(2) | 25(1) |
| C(10) | 2093(3) | 5899(1) | 7004(2) | 28(1) |
| C(11) | 457(3) | 5965(1) | 6227(3) | 37(1) |
| C(12) | -588(3) | 5529(1) | 6597(3) | 34(1) |
| C(13) | 33(3) | 4988(1) | 6355(2) | 26(1) |
| C(14) | 1643(2) | 4945(1) | 7247(2) | 26(1) |
| C(15) | 1996(3) | 4354(1) | 7202(3) | 38(1) |
| C(16) | 443(3) | 4089(1) | 7141(3) | 37(1) |
| C(17) | -694(3) | 4538(1) | 7047(2) | 28(1) |
| C(18) | 1578(3) | 7872(1) | 5666(3) | 46(1) |
| C(19) | -25(3) | 4881(1) | 4691(2) | 39(1) |
| C(20) | -3088(3) | 4126(1) | 6801(2) | 28(1) |
| C(101) | -14157(3) | 397(1) | 7821(3) | 38(1) |
| C(102) | -13772(3) | -121(1) | 7840(2) | 31(1) |
| C(103) | -12290(3) | -290(1) | 8273(2) | 30(1) |
| C(104) | -11214(3) | 94(1) | 8711(2) | 27(1) |
| C(105) | -11571(3) | 626(1) | 8710(2) | 27(1) |
| C(106) | -13069(3) | 779(1) | 8273(3) | 36(1) |
| C(107) | -13559(3) | 1346(1) | 8210(4) | 61(1) |
| C(108) | -12364(3) | 1712(1) | 9020(4) | 50(1) |
| C(109) | -10863(3) | 1580(1) | 8603(3) | 32(1) |
| C(110) | -10354(2) | 1037(1) | 9213(2) | 26(1) |
| C(111) | -8794(3) | 884(1) | 8922(3) | 32(1) |
| C(112) | -7617(3) | 1313(1) | 9384(3) | 31(1) |
| C(113) | -8135(3) | 1843(1) | 8697(2) | 26(1) |
| C(114) | -9642(3) | 1976(1) | 9172(3) | 30(1) |
| C(115) | -9900(3) | 2557(1) | 8764(3) | 42(1) |
| C(116) | -8289(3) | 2791(1) | 9049(3) | 38(1) |
| C(117) | -7216(3) | 2319(1) | 9336(2) | 28(1) |
| C(118) | -10530(3) | -987(1) | 8519(3) | 39(1) |
| C(119) | -8224(3) | 1829(1) | 7001(2) | 40(1) |
| C(120) | -5034(3) | 2790(1) | 9059(2) | 29(1) |

**Table 3.** Bond lengths [Å] and angles [o] for **50**.

| S(1)-O(2) | 1.4115(18) | S(1)-O(1) | 1.4158(17) |
| --- | --- | --- | --- |
| S(1)-N(1) | 1.584(2) | S(1)-O(3) | 1.6069(16) |
| S(2)-O(8) | 1.4163(17) | S(2)-O(7) | 1.4271(16) |
| S(2)-O(9) | 1.5946(17) | S(2)-N(3) | 1.600(2) |
| O(3)-C(2) | 1.412(3) | O(4)-C(3) | 1.373(3) |
| O(4)-C(18) | 1.428(3) | O(5)-C(20) | 1.337(3) |
| O(5)-C(17) | 1.454(3) | O(6)-C(20) | 1.221(3) |
| O(9)-C(102) | 1.427(3) | O(10)-C(103) | 1.351(3) |
| O(10)-C(118) | 1.417(3) | O(11)-C(120) | 1.338(3) |
| O(11)-C(117) | 1.453(3) | O(12)-C(120) | 1.222(3) |
| N(2)-C(20) | 1.335(3) | N(4)-C(120) | 1.333(3) |
| C(1)-C(2) | 1.388(3) | C(1)-C(6) | 1.400(3) |
| C(2)-C(3) | 1.378(3) | C(3)-C(4) | 1.384(3) |
| C(4)-C(5) | 1.402(3) | C(5)-C(6) | 1.393(3) |
| C(5)-C(10) | 1.521(3) | C(6)-C(7) | 1.519(3) |
| C(7)-C(8) | 1.522(3) | C(8)-C(9) | 1.529(3) |
| C(9)-C(14) | 1.514(3) | C(9)-C(10) | 1.539(3) |
| C(10)-C(11) | 1.531(3) | C(11)-C(12) | 1.536(3) |
| C(12)-C(13) | 1.521(3) | C(13)-C(17) | 1.518(3) |
| C(13)-C(19) | 1.536(3) | C(13)-C(14) | 1.539(3) |
| C(14)-C(15) | 1.543(3) | C(15)-C(16) | 1.550(3) |
| C(16)-C(17) | 1.530(3) | C(101)-C(102) | 1.368(4) |
| C(101)-C(106) | 1.393(3) | C(102)-C(103) | 1.395(3) |
| C(103)-C(104) | 1.387(3) | C(104)-C(105) | 1.397(3) |
| C(105)-C(106) | 1.396(3) | C(105)-C(110) | 1.529(3) |
| C(106)-C(107) | 1.511(4) | C(107)-C(108) | 1.518(4) |
| C(108)-C(109) | 1.511(3) | C(109)-C(114) | 1.518(3) |
| C(109)-C(110) | 1.533(3) | C(110)-C(111) | 1.530(3) |
| C(111)-C(112) | 1.532(3) | C(112)-C(113) | 1.528(3) |
| C(113)-C(117) | 1.528(3) | C(113)-C(119) | 1.538(3) |
| C(113)-C(114) | 1.539(3) | C(114)-C(115) | 1.538(3) |
| C(115)-C(116) | 1.551(4) | C(116)-C(117) | 1.539(3) |
|  |  |  |  |
| O(2)-S(1)-O(1) | 121.04(12) | O(2)-S(1)-N(1) | 108.28(11) |
| O(1)-S(1)-N(1) | 109.95(12) | O(2)-S(1)-O(3) | 107.99(10) |
| O(1)-S(1)-O(3) | 101.66(9) | N(1)-S(1)-O(3) | 106.97(10) |
| O(8)-S(2)-O(7) | 119.66(10) | O(8)-S(2)-O(9) | 110.13(10) |
| O(7)-S(2)-O(9) | 100.93(9) | O(8)-S(2)-N(3) | 108.48(11) |
| O(7)-S(2)-N(3) | 113.16(11) | O(9)-S(2)-N(3) | 102.93(10) |
| C(2)-O(3)-S(1) | 119.77(13) | C(3)-O(4)-C(18) | 117.05(19) |
| C(20)-O(5)-C(17) | 116.87(16) | C(102)-O(9)-S(2) | 120.38(14) |
| C(103)-O(10)-C(118) | 117.79(19) | C(120)-O(11)-C(117) | 115.43(17) |
| C(2)-C(1)-C(6) | 120.4(2) | C(3)-C(2)-C(1) | 121.2(2) |
| C(3)-C(2)-O(3) | 118.4(2) | C(1)-C(2)-O(3) | 120.0(2) |
| O(4)-C(3)-C(2) | 116.7(2) | O(4)-C(3)-C(4) | 124.8(2) |
| C(2)-C(3)-C(4) | 118.4(2) | C(3)-C(4)-C(5) | 121.7(2) |
| C(6)-C(5)-C(4) | 119.2(2) | C(6)-C(5)-C(10) | 120.8(2) |
| C(4)-C(5)-C(10) | 120.0(2) | C(5)-C(6)-C(1) | 119.0(2) |
| C(5)-C(6)-C(7) | 122.3(2) | C(1)-C(6)-C(7) | 118.6(2) |
| C(6)-C(7)-C(8) | 113.65(19) | C(7)-C(8)-C(9) | 109.17(18) |
| C(14)-C(9)-C(8) | 114.18(17) | C(14)-C(9)-C(10) | 108.90(18) |
| C(8)-C(9)-C(10) | 108.75(18) | C(5)-C(10)-C(11) | 112.79(18) |
| C(5)-C(10)-C(9) | 111.19(18) | C(11)-C(10)-C(9) | 112.23(18) |
| C(10)-C(11)-C(12) | 113.45(19) | C(13)-C(12)-C(11) | 111.61(19) |
| C(17)-C(13)-C(12) | 115.39(19) | C(17)-C(13)-C(19) | 109.71(18) |
| C(12)-C(13)-C(19) | 110.9(2) | C(17)-C(13)-C(14) | 99.35(17) |
| C(12)-C(13)-C(14) | 109.04(18) | C(19)-C(13)-C(14) | 111.93(19) |
| C(9)-C(14)-C(13) | 112.73(17) | C(9)-C(14)-C(15) | 120.67(19) |
| C(13)-C(14)-C(15) | 103.68(17) | C(14)-C(15)-C(16) | 103.77(19) |
| C(17)-C(16)-C(15) | 105.62(19) | O(5)-C(17)-C(13) | 110.26(17) |
| O(5)-C(17)-C(16) | 113.44(18) | C(13)-C(17)-C(16) | 104.74(19) |
| O(6)-C(20)-N(2) | 124.9(2) | O(6)-C(20)-O(5) | 123.6(2) |
| N(2)-C(20)-O(5) | 111.56(19) | C(102)-C(101)-C(106) | 120.6(2) |
| C(101)-C(102)-C(103) | 122.1(2) | C(101)-C(102)-O(9) | 120.4(2) |
| C(103)-C(102)-O(9) | 117.2(2) | O(10)-C(103)-C(104) | 126.4(2) |
| O(10)-C(103)-C(102) | 116.8(2) | C(104)-C(103)-C(102) | 116.9(2) |
| C(103)-C(104)-C(105) | 122.4(2) | C(106)-C(105)-C(104) | 119.0(2) |
| C(106)-C(105)-C(110) | 120.2(2) | C(104)-C(105)-C(110) | 120.9(2) |
| C(101)-C(106)-C(105) | 119.1(2) | C(101)-C(106)-C(107) | 118.1(2) |
| C(105)-C(106)-C(107) | 122.7(2) | C(106)-C(107)-C(108) | 113.2(2) |
| C(109)-C(108)-C(107) | 109.4(2) | C(108)-C(109)-C(114) | 113.2(2) |
| C(108)-C(109)-C(110) | 109.6(2) | C(114)-C(109)-C(110) | 108.98(18) |
| C(105)-C(110)-C(111) | 114.10(18) | C(105)-C(110)-C(109) | 110.97(18) |
| C(111)-C(110)-C(109) | 113.10(19) | C(110)-C(111)-C(112) | 112.71(18) |
| C(113)-C(112)-C(111) | 111.86(19) | C(117)-C(113)-C(112) | 116.22(18) |
| C(117)-C(113)-C(119) | 109.26(18) | C(112)-C(113)-C(119) | 110.53(19) |
| C(117)-C(113)-C(114) | 99.45(17) | C(112)-C(113)-C(114) | 107.53(18) |
| C(119)-C(113)-C(114) | 113.54(19) | C(109)-C(114)-C(115) | 119.33(19) |
| C(109)-C(114)-C(113) | 112.43(18) | C(115)-C(114)-C(113) | 104.40(18) |
| C(114)-C(115)-C(116) | 103.43(19) | C(117)-C(116)-C(115) | 105.80(19) |
| O(11)-C(117)-C(113) | 109.67(17) | O(11)-C(117)-C(116) | 111.36(18) |
| C(113)-C(117)-C(116) | 105.95(18) | O(12)-C(120)-N(4) | 124.4(2) |
| O(12)-C(120)-O(11) | 123.6(2) | N(4)-C(120)-O(11) | 112.00(19) |

Symmetry transformations used to generate equivalent atoms:

**Table 4.** Anisotropic displacement parameters (Å2 x 103) for 1. The anisotropic displacement factor exponent takes the form: -2 gpi2 [ h2 a*2 U11 + ... + 2 h k a* b* U

| Atom | U11 | U22 | U33 | U23 | U13 | U12 |
| --- | --- | --- | --- | --- | --- | --- |
|  |  |  |  |  |  |  |
| S(1) | 37(1) | 32(1) | 36(1) | -1(1) | 11(1) | -11(1) |
| S(2) | 24(1) | 27(1) | 33(1) | 0(1) | 3(1) | -2(1) |
| O(1) | 65(1) | 43(1) | 47(1) | 1(1) | 25(1) | -23(1) |
| O(2) | 32(1) | 52(1) | 52(1) | 0(1) | 7(1) | -1(1) |
| O(3) | 38(1) | 29(1) | 31(1) | 0(1) | 13(1) | -9(1) |
| O(4) | 36(1) | 26(1) | 59(1) | 8(1) | 7(1) | 1(1) |
| O(5) | 30(1) | 40(1) | 28(1) | 2(1) | 6(1) | -16(1) |
| O(6) | 42(1) | 42(1) | 30(1) | 4(1) | 10(1) | -16(1) |
| O(7) | 33(1) | 34(1) | 41(1) | -4(1) | 0(1) | -10(1) |
| O(8) | 34(1) | 29(1) | 59(1) | 0(1) | 9(1) | 6(1) |
| O(9) | 31(1) | 42(1) | 33(1) | -7(1) | 8(1) | -13(1) |
| O(10) | 35(1) | 27(1) | 68(1) | -11(1) | 17(1) | -6(1) |
| O(11) | 33(1) | 23(1) | 37(1) | -4(1) | 12(1) | -8(1) |
| O(12) | 55(1) | 40(1) | 38(1) | -13(1) | 19(1) | -21(1) |
| N(1) | 52(2) | 30(1) | 35(1) | 1(1) | 11(1) | 1(1) |
| N(2) | 32(1) | 42(1) | 34(1) | 3(1) | 9(1) | -13(1) |
| N(3) | 31(1) | 41(1) | 30(1) | -2(1) | 6(1) | -1(1) |
| N(4) | 38(1) | 28(1) | 39(1) | -6(1) | 12(1) | -12(1) |
| C(1) | 24(1) | 34(1) | 31(1) | -6(1) | 9(1) | -4(1) |
| C(2) | 29(1) | 26(1) | 28(1) | -1(1) | 9(1) | -6(1) |
| C(3) | 31(1) | 27(1) | 34(1) | 2(1) | 5(1) | 0(1) |
| C(4) | 24(1) | 27(1) | 40(1) | -1(1) | 9(1) | -2(1) |
| C(5) | 24(1) | 25(1) | 31(1) | -2(1) | 7(1) | -4(1) |
| C(6) | 25(1) | 26(1) | 30(1) | -4(1) | 7(1) | -2(1) |
| C(7) | 24(1) | 29(1) | 38(1) | 0(1) | 5(1) | -2(1) |
| C(8) | 27(1) | 28(1) | 35(1) | 2(1) | 3(1) | 1(1) |
| C(9) | 25(1) | 25(1) | 24(1) | 0(1) | 4(1) | -3(1) |
| C(10) | 26(1) | 25(1) | 32(1) | 0(1) | 8(1) | 0(1) |
| C(11) | 25(1) | 27(1) | 58(2) | 6(1) | 6(1) | -2(1) |
| C(12) | 26(1) | 34(1) | 43(1) | 4(1) | 6(1) | -2(1) |
| C(13) | 27(1) | 29(1) | 24(1) | 3(1) | 5(1) | -7(1) |
| C(14) | 28(1) | 28(1) | 23(1) | -1(1) | 5(1) | -4(1) |
| C(15) | 35(1) | 25(1) | 51(1) | 3(1) | 6(1) | -2(1) |
| C(16) | 43(2) | 28(1) | 43(1) | 1(1) | 9(1) | -7(1) |
| C(17) | 28(1) | 32(1) | 25(1) | -1(1) | 6(1) | -10(1) |
| C(18) | 38(2) | 26(1) | 73(2) | 3(1) | 6(1) | 5(1) |
| C(19) | 41(2) | 53(2) | 23(1) | 2(1) | 5(1) | -18(1) |
| C(20) | 33(1) | 24(1) | 30(1) | -4(1) | 13(1) | -5(1) |
| C(101) | 30(1) | 36(2) | 48(1) | 10(1) | 7(1) | -3(1) |
| C(102) | 30(1) | 36(1) | 28(1) | -1(1) | 7(1) | -9(1) |
| C(103) | 36(2) | 26(1) | 30(1) | -3(1) | 11(1) | -6(1) |
| C(104) | 25(1) | 31(1) | 26(1) | 2(1) | 7(1) | -3(1) |
| C(105) | 28(1) | 26(1) | 30(1) | 2(1) | 9(1) | -4(1) |
| C(106) | 29(1) | 28(1) | 51(2) | 7(1) | 10(1) | -3(1) |
| C(107) | 30(2) | 32(2) | 123(3) | 16(2) | 16(2) | 1(1) |
| C(108) | 33(2) | 27(1) | 93(2) | 6(1) | 20(1) | 0(1) |
| C(109) | 30(1) | 25(1) | 42(1) | 4(1) | 12(1) | 1(1) |
| C(110) | 24(1) | 22(1) | 33(1) | 2(1) | 11(1) | -2(1) |
| C(111) | 31(1) | 22(1) | 45(1) | 1(1) | 11(1) | -2(1) |
| C(112) | 24(1) | 23(1) | 48(1) | -2(1) | 9(1) | 0(1) |
| C(113) | 26(1) | 23(1) | 32(1) | 0(1) | 8(1) | -2(1) |
| C(114) | 32(1) | 22(1) | 37(1) | 4(1) | 12(1) | 0(1) |
| C(115) | 35(2) | 28(1) | 66(2) | 4(1) | 17(1) | 1(1) |
| C(116) | 34(1) | 27(1) | 57(2) | 2(1) | 15(1) | 1(1) |
| C(117) | 32(1) | 26(1) | 30(1) | -1(1) | 15(1) | -5(1) |
| C(118) | 45(2) | 25(1) | 46(1) | 3(1) | 9(1) | -1(1) |
| C(119) | 41(2) | 45(2) | 36(1) | -7(1) | 9(1) | -16(1) |
| C(120) | 29(1) | 23(1) | 37(1) | 1(1) | 7(1) | -6(1) |

**Table 5.** Hydrogen coordinates ( x 104) and isotropic displacement parameters (Å2 x 103) for **50**.

| Atom | x | y | z | U(eq) |
| --- | --- | --- | --- | --- |
|  |  |  |  |  |
| H(2A) | -5085 | 3844 | 6171 | 43 |
| H(2B) | -4514 | 4152 | 4956 | 43 |
| H(4A) | -3550 | 3187 | 8252 | 41 |
| H(4B) | -4264 | 2751 | 7223 | 41 |
| H(1) | 6542 | 6527 | 5993 | 35 |
| H(4) | 1554 | 6902 | 6265 | 36 |
| H(7A) | 6287 | 5718 | 7593 | 36 |
| H(7B) | 5525 | 5506 | 5987 | 36 |
| H(8A) | 4357 | 5411 | 8679 | 37 |
| H(8B) | 4684 | 4944 | 7604 | 37 |
| H(9) | 2715 | 5297 | 5697 | 30 |
| H(10) | 2105 | 5940 | 8094 | 33 |
| H(11A) | 422 | 5972 | 5138 | 44 |
| H(11B) | 80 | 6307 | 6519 | 44 |
| H(12A) | -713 | 5564 | 7648 | 41 |
| H(12B) | -1590 | 5569 | 5962 | 41 |
| H(14) | 1574 | 5027 | 8303 | 32 |
| H(15A) | 2709 | 4246 | 8103 | 45 |
| H(15B) | 2428 | 4266 | 6311 | 45 |
| H(16A) | 205 | 3859 | 6258 | 45 |
| H(16B) | 434 | 3876 | 8045 | 45 |
| H(17) | -831 | 4637 | 8073 | 34 |
| H(18A) | 747 | 7659 | 5141 | 69 |
| H(18B) | 1405 | 8241 | 5390 | 69 |
| H(18C) | 1636 | 7833 | 6742 | 69 |
| H(19A) | 438 | 4541 | 4566 | 59 |
| H(19B) | 526 | 5157 | 4267 | 59 |
| H(19C) | -1075 | 4878 | 4178 | 59 |
| H(101) | -15175 | 498 | 7498 | 45 |
| H(104) | -10196 | -10 | 9023 | 33 |
| H(10A) | -14477 | 1378 | 8654 | 73 |
| H(10B) | -13819 | 1455 | 7156 | 73 |
| H(10C) | -12633 | 2080 | 8744 | 60 |
| H(10D) | -12301 | 1675 | 10107 | 60 |
| H(109) | -10992 | 1568 | 7493 | 38 |
| H(110) | -10259 | 1062 | 10318 | 31 |
| H(11C) | -8860 | 810 | 7849 | 38 |
| H(11D) | -8465 | 559 | 9478 | 38 |
| H(11E) | -7418 | 1345 | 10481 | 38 |
| H(11F) | -6665 | 1212 | 9067 | 38 |
| H(114) | -9466 | 1955 | 10283 | 35 |
| H(11G) | -10537 | 2728 | 9402 | 50 |
| H(11H) | -10383 | 2598 | 7709 | 50 |
| H(11I) | -8105 | 2992 | 8172 | 46 |
| H(11J) | -8147 | 3027 | 9923 | 46 |
| H(117) | -6865 | 2273 | 10429 | 34 |
| H(11K) | -9961 | -821 | 7828 | 58 |
| H(11L) | -10506 | -1369 | 8399 | 58 |
| H(11M) | -10078 | -894 | 9543 | 58 |
| H(11N) | -7227 | 1751 | 6774 | 60 |
| H(11O) | -8566 | 2170 | 6578 | 60 |
| H(11P) | -8935 | 1557 | 6570 | 60 |
| H(1B) | 5770(30) | 7978(10) | 7840(20) | 50(8) |
| H(1A) | 5040(30) | 8343(10) | 6480(30) | 60(9) |
| H(3A) | -15880(20) | -842(10) | 10290(20) | 36(7) |
| H(3B) | -14570(50) | -627(16) | 9890(60) | 180(20) |

**13C NMR data for compounds**

**2**. 13C NMR (CDCl3) δ 11.0, 14.4, 23.0, 23.1, 26.3, 27.2, 29.2, 30.5, 36.7, 38.9, 43.2, 43.9, 49.9, 82.0, 115.2, 126.3, 127.3, 132.3, 135.3, 151.3;

**7**. 13C NMR (CDCl3) δ 13.8, 21.5, 25.9, 26.6, 29.2, 31.5, 35.8, 38.3, 43.9, 44.5, 48.0, 50.4, 62.9, 115.8, 119.5, 125.1, 130.1, 136.8, 155.8, 221.1;

**8.** 13C NMR (CDCl3) δ 11.0, 15.6, 23.1, 26.3, 27.2, 29.2, 30.5, 36.7, 38.9, 43.2, 43.8, 49.9, 82.0, 114.9, 120.9, 127.9, 132.3, 135.4, 151.7;

**9**. 13C NMR (CDCl3) δ 13.9, 21.6, 26.0, 26.5, 28.8, 29.7, 31.6, 34.5, 35.9, 38.5, 44.2, 48.1, 50.4, 116.6, 124.0, 131.2, 133.5, 135.1, 152.2, 221.5;

**10**. 13C NMR (CDCl3) δ 11.1, 23.1, 26.4, 27.2, 28.9, 29.7, 30.5, 34.5, 36.7, 38.9, 43.2, 44.2, 50.0, 82.0, 116.5, 124.1, 131.8, 133.3, 135.4, 152.9;

**12**. 13C NMR (CDCl3)  12.0, 21.2, 23.2, 26.0, 26.9, 27.5, 30.0, 31.9, 36.6, 38.4, 42.8, 43.5, 49.6, 55.4, 82.6, 111.7, 125.5, 127.6, 132.5, 143.4, 157.0, 171.2, 199.5;

**13**. 13C NMR (CDCl3) δ 8.5, 12.0, 21.2, 23.2, 26.0, 27.0, 27.5, 30.0, 36.7, 37.0, 38.4, 42.8, 43.6, 49.6, 55.4, 82.6, 111.7, 125.7, 127.5, 132.5, 142.8, 156.6, 171.2, 203.1;

**14**. 13C NMR (CDCl3) δ 12.0, 13.0, 17.9, 21.2, 23.2, 26.0, 27.0, 27.5, 29.9, 36.7, 38.4, 42.8, 43.5, 45.7, 49.6, 55.4, 82.6, 111.6, 126.0, 127.5, 132.5, 142.7, 156.5, 171.2, 202.7;

**15**. 13C NMR (CDCl3) δ 12.0, 21.2, 23.2, 26.2, 26.5, 28.8, 27.5, 29.8, 36.7, 38.3, 42.8, 43.3, 49.8, 82.5, 117.5, 117.8, 127.3, 131.4, 147.1, 160.0, 171.2, 204.0;

**16**. 13C NMR (CDCl3) δ 8.3, 12.0, 21.2, 23.2, 26.2, 26.8, 27.5, 29.8, 31.4, 36.7, 38.3, 42.8, 43.3, 49.7, 82.5, 117.2, 117.6, 126.4, 131.2, 146.7, 160.0, 171.2, 206.7;

**17**. 13C NMR (CDCl3) δ 12.0,13.8, 17.9, 21.2, 23.2,26.1, 26.7, 27.5, 30.0, 36.6, 38.2, 39.9, 42.7, 43.3, 49.7, 82.5, 117.4, 117.6, 126.5, 131.2, 146.7, 160.1, 171.2, 206.3;

**18**. 13C NMR (CDCl3) δ 12.0, 14.4, 21.2, 23.0, 2.2, 26.2, 27.2, 27.5, 29.2, 36.9, 38.6, 42.8, 43.8, 49.7, 82.9, 115.2, 126.3, 17.3, 132.3, 135.3, 151.3, 171.6;

**19**. 13C NMR (CDCl3) δ 12.0, 14.1, 21.2, 23.2, 23.3, 26.2, 27.2, 2.5, 29.2, 32.1, 36.8, 38.6, 42.9, 43.8, 49.7, 82.8, 115.2, 125.7, 127.2, 132.2, 135.4, 151.3, 171.4;

**20**. 13C NMR (CDCl3) δ 12.0, 14.0, 21.2, 22.7, 23.2, 26.2, 27.2, 27.5, 29.2, 29.7, 32.4, 36.9, 38.6, 42.9, 43.8, 49.7, 82.8, 115.2, 125.9, 127.1, 132.2, 135.3, 151.3, 171.4;

**21**. 13C NMR (CDCl3) δ 11.1, 22.7, 22.8, 23.1, 26.4, 27.0, 27.2, 29.1, 30.5, 36.7, 38.9, 43.2, 44.1, 50.0, 82.0, 115.3, 123.3, 131.7, 132.4, 135.0, 150.7;

**22**. 13C NMR (CDCl3) δ 11.0, 23.0, 26.4, 27.1, 29.1, 30.3, 30.4, 30.5, 36.6, 3.8, 43.2, 43.9, 50.0, 75.9, 81.8, 117.3, 122.1, 128.5, 131.2, 137.5, 153.2;

**23**. 13C NMR (CDCl3) δ 11.1, 14.2, 23.1, 23.3, 26.4, 27.2, 29.2, 30.5, 32.1, 36.7, 38.8, 43.2, 43.9, 49.9, 82.0, 115.2, 125.7, 127.2, 132.3, 135.4, 151.3;

**24**. 13C NMR (CDCl3) δ 11.0, 14.0, 22.7, 23.1, 26.4, 27.2, 29.2, 29.7, 30.5, 32.3, 36.7, 38.8, 43.2, 43.9, 50.0, 82.0, 115.2, 125.8, 127.1, 132.4, 135.4, 151.2;

**27**. 13C NMR (DMSO-*d*6) δ 11.6, 16.1, 22.6, 25.6, 26.5, 27.5, 28.6, 35.9, 37.9, 42.6, 43.4, 48.7, 87.4, 121.9, 127.8, 128.2, 135.0, 137.9, 146.6;

**28**. 13C NMR (DMSO-*d*6) δ 11.6, 13.9, 22.6, 23.2, 25.6, 26.5, 27.5, 28.7, 31.4, 35.9, 37.9, 42.6, 43.5, 48.7, 87.4, 121.6, 127.4,132.0, 135.1, 137.8, 146.4;

**29**. 13C NMR (DMSO-*d*6) δ 11.6, 22.6, 23.2, 23.3, 25.6, 26.0, 26.5, 27.5, 28.6, 35.9, 37.9, 42.6, 43.7, 48.7, 87.4, 121.6, 123.6, 134.8, 138.0, 138.1, 145.3;

**30**. 13C NMR (DMSO-*d*6) δ 11.6, 13.9, 22.1, 22.6, 25.6, 26.5, 27.5, 28.7, 29.1, 32.2, 35.9, 37.9, 42.6, 43.5, 48.7, 87.4, 121.6, 127.3, 132.2, 135.0, 137.8, 146.4;

**31**. 13C NMR (DMSO-*d*6) δ 12.1, 23.2, 26.1, 27.1, 28.0, 29.0, 30.9, 34.8, 36.5, 38.4, 43.2, 44.2, 49.2, 88.0, 120.2, 124.6, 135.8, 136.7, 137.5, 148.5;

**32**. 13C NMR (CDCl3) δ 12.0, 14.6, 21.2, 23.0, 23.2, 26.0, 27.0, 27.5, 29.1, 36.8, 38.1, 42.8, 44.0, 49.8, 82.6, 121.4, 127.0, 133., 135.9, 139.3, 146.1, 171.3 ;

**33**. 13C NMR (CDCl3) δ 12.0, 14.0, 21.2, 23.2, 23.6, 26.0, 27.0, 27.5, 29.1, 32.0, 36.8, 38.1, 42.8, 44.0, 49.8, 82.6, 121.3, 127.7, 132.1, 135.9, 139.1, 146.3, 171.3 ;

**34**. 13C NMR (CDCl3) δ 12.0, 14.0, 21.2, 22.6, 23.2, 26.0, 27.0, 27.5, 29.1, 29.7, 32.6, 36.8, 38.1, 42.8, 44.0, 49.8, 82.7, 121.3, 127.7, 132.4, 135.8, 139.1, 146.3, 171.4;

**37**. 13C NMR (CDCl3)  12.7, 23.7, 26.5, 27.6, 27.9, 30.12, 37.2, 38.9, 43.5, 44.1, 49.9, 70.3, 86.7, 92.2, 112.6, 115.1, 126.6, 127.7, 128.1, 128.8, 132.7, 137.4, 138.0, 150.0, 156.9, 157.8;

**38**. 13C NMR (CDCl3) 12.3, 23.2, 26.4, 27.3, 27.5, 29.2, 36.8, 38.5, 43.2, 44.1, 49.5, 56.3, 71.0, 86.3, 91.8, 109.6, 114.4, 127.1, 127.6, 128.3, 128.5, 132.3, 137.2, 146.2, 147.4, 149.6, 157.4;

**39**. 13C NMR(CDCl3)  12.1, 23.2, 26.2, 27.2, 27.6, 29.8, 36.9, 38.6, 42.9, 43.8, 49.7, 70.0, 83.4, 112.3, 114.8, 126.4, 127.5, 127.9, 128.6, 132.9, 137.3, 138.0, 156.7, 157.2;

**40**. 13C NMR(DMSO-*d*6)  12.0, 23.1, 26.4, 27.2, 27.6, 29.1, 36.9, 38.5, 42.8, 44.1, 49.6, 56.3, 71.0, 83.3, 109.7, 114.5, 127.3, 127.7, 128.5, 128.7, 132.8, 137.4, 146.3, 147.5, 157.0;

**41**. 13C NMR(DMSO-*d*6)  12.4, 23.2, 26.4, 27.3, 27.9, 29.6, 37.1, 38.8, 42.8, 43.8, 49.6, 81.8, 113.2, 115.4, 126.5, 130.7, 137.6, 155.4, 157.3;

**42**. 13C NMR(DMSO-*d*6)  12.0, 22.7, 26.0, 26.9, 27.4, 28.4, 36.6, 38.3, 42.3, 43.6, 49.2, 55.8, 81.3, 109.7, 115.6, 128.2, 130.2, 144.3, 148.6, 156.8;

**43**. 13C NMR (DMSO-*d*6) δ 12.0, 15.9, 22.7, 26.0, 27.0, 27.4, 28.8, 36.6, 38.4, 42.4, 43.3, 49.2, 81.3, 114.4, 120.8, 127.4, 129.9, 134.0, 153.0, 156.9;

**44**. 13C NMR (DMSO-*d*6) δ 12.0, 14.3, 22.7, 22.9, 26.0, 27.0, 27.5, 28.8, 36.6, 38.4, 42.4, 43.4, 49.2, 81.4, 114.6, 125.8, 127.1, 130.0, 134.1, 152.6, 156.9;

**45**. 13C NMR (DMSO-*d*6) δ 12.0, 14.0, 22.7, 22.9, 26.0, 27.0, 27.4, 28.8, 31.8, 36.6, 38.4, 42.3, 43.3, 49.2, 81.3, 14.7, 125.5, 126.6, 130.0, 134.1, 152.7, 156.8;

**46**. 13C NMR (CDCl3) δ 12.0, 22.7, 22.8, 23.1, 26.3, 27.0, 27.2, 27.6, 29.1, 36.8, 38.6, 42.8, 44.0, 49.6, 83.5, 115.3, 123.3, 131.7, 132.2, 134.9, 150.8, 157.4;

**47**. 13C NMR (CDCl3) δ 12.0, 14.0, 22.7, 23.1, 26.3, 27.2, 27.6, 29.2, 29.7, 32.4, 26.8, 38.6, 42.8, 43.8, 49.6, 83.4, 115.2, 125.9, 127.1, 132.2, 135.3, 151.3, 157.2;

**48**. 13C NMR (DMSO-*d*6) δ 12.0, 22.8, 26.0, 27.0, 27.5, 28.5, 29.5, 34.2, 36.6, 38.5, 42.3, 43.6, 49.2, 81.4, 116.0, 122.9, 129.4, 132.4, 134.2, 153.4, 156.9;

**49**. 13C-NMR(DMSO-*d*6)  12.4, 23.2, 26.2, 27.0, 27.9, 29.5, 36.7, 38.3, 42.8, 43.9, 49.6, 81.7, 119.8, 122.4, 127.1, 138.5, 138.7, 148.4, 157.3;

**50**. 13C NMR (CDCl3) δ 12.0, 23.1, 26.3, 26.9, 27.6, 28.6, 6.8, 3.0, 42.8, 44.3, 49.7, 56.4, 83.2, 110.1, 124.1, 130.2, 136.8, 140.3, 148.9, 157.0;

**51**. 13C NMR (DMSO-*d*6) δ 11.9, 16.1, 22.7, 25.8, 26.6, 27.4, 28.6, 36.5, 37.9, 42.3, 43.5, 49.2, 81.3, 121.9, 127.8, 128.2, 135.0, 138.0, 146.6, 156.9;

**52**. 13C NMR (DMSO-*d*6) δ 12.0, 14.8, 22.5, 22.7, 25.8, 26.6, 27.5, 28.7, 36.6, 38.0, 42.3, 43.6, 49.2, 81.3, 121.7, 126.6, 133.6, 135.1, 138.1, 146.1, 156.9;

**53**. 13C NMR (CDCl3) δ 12.0, 14.1, 23.1, 23.6, 26.0, 27, 27.5, 29.1, 32.0, 36.8, 38.2, 42.8, 44.0, 49.7, 83.3, 121.3, 127.7, 132.1, 135.9, 139.1, 146.3, 157.1;

**54**. 13C NMR (DMSO-*d*6) δ 12.0, 22.7, 23.3, 23.4, 25.8, 26.0, 26.6, 27.5, 28.7, 36.6, 38.0, 42.3, 43.8, 49.2, 81.3, 121.6, 123.6, 134.9, 138.0, 138.2, 145.3, 156.9;

**55**. 13C NMR (CDCl3) δ 12.0, 14.0, 22.6, 23.1, 26.0, 26.9, 27.5, 29.1, 29.7, 32.6, 36.8, 38.1, 42.7, 44.0, 49.7, 83.3, 121.3, 127.6, 132.4, 135.8, 139.1, 146.3, 157.3;

**56**. 13C NMR (DMSO-*d*6) δ 12.0, 22.7, 25.7, 26.7, 27.5, 28.5, 30.4, 34.2, 36.6, 38.0, 42.3, 43.7, 49.2, 81.4, 119.7, 124.1, 135.3, 136.3, 136.9, 147.9, 156.9;

**IR data.**

37. IR (KBr) max: 3510, 3397, 2987, 1805 (C=O), 1739 (C=O), 1491 cm-1;

38. IR (KBr) max: 3520, 3390, 2985, 1805 (C=O), 1746 (C=O), 1490 cm-1;

39. IR (KBr) max: 3535, 3424, 2930, 1726 (C=O), 1606, 1584,1498,1376,1344 cm-1

40. IR (KBr) max: 3536, 3423, 2935,1726 (C=O), 1584, 1513 cm-1;

41. IR (KBr) max: 3685, 3598, 3424, 3318, , 2988, 1726 (C=O), 1606, 1584, 1500 cm-1;

42. IR (KBr) max: 3685, 3537, 3424, 3049, 2936, 1726 (C=O), 1584, 1506, 1344, 1068 cm-1;

49. IR (KBr) max: 3686, 3536, 3425 3340, 2987, 1727 (C=O), 1605, 1584, 1492, 1397, 1188, 1067 cm-1;

50. IR (KBr) max: 3686, 3536, 3423, 3326, 3063-2880, 1727 (C=O), 1584, 1506, 1398, 1190, 1112, 1070 cm-1;
